# Supplementary material for: Efficacy and safety of pirfenidone in the treatment of idiopathic pulmonary fibrosis patients: a systematic review and meta-analysis of randomised controlled trials
Source: HighWire-hosted journal article supplement (doi:10.1136/bmjopen-2021-050004), 2021-12-01
Supplement: bmjopen-2021-050004supp001_data_supplement.pdf [file bmjopen-2021-050004supp001_data_supplement.pdf]

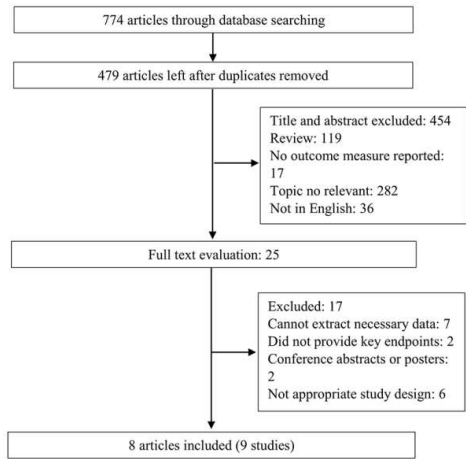

Supplementary Figure 1. Flowchart of the study selection.

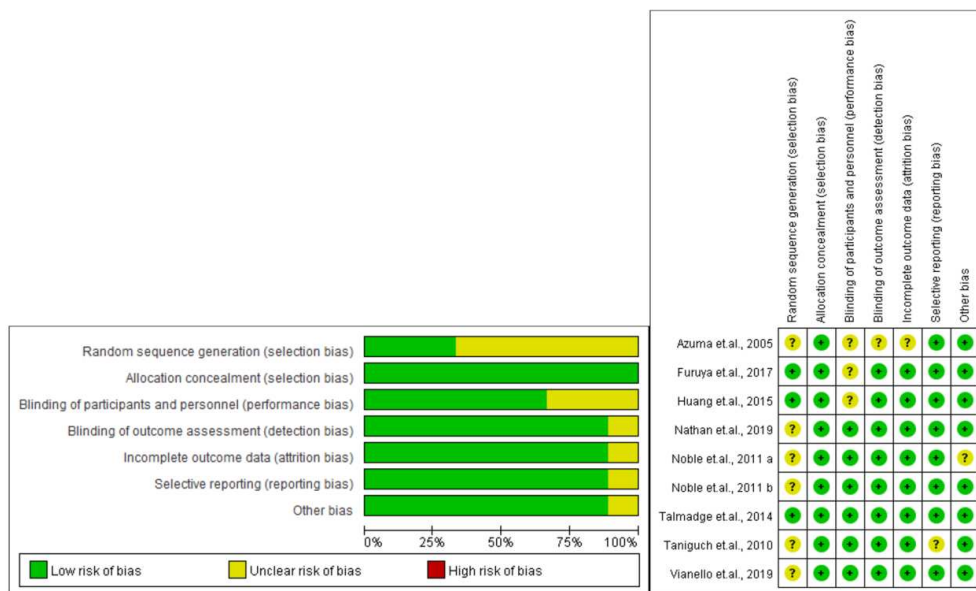

Supplementary Figure 2. Quality assessment of included studies.

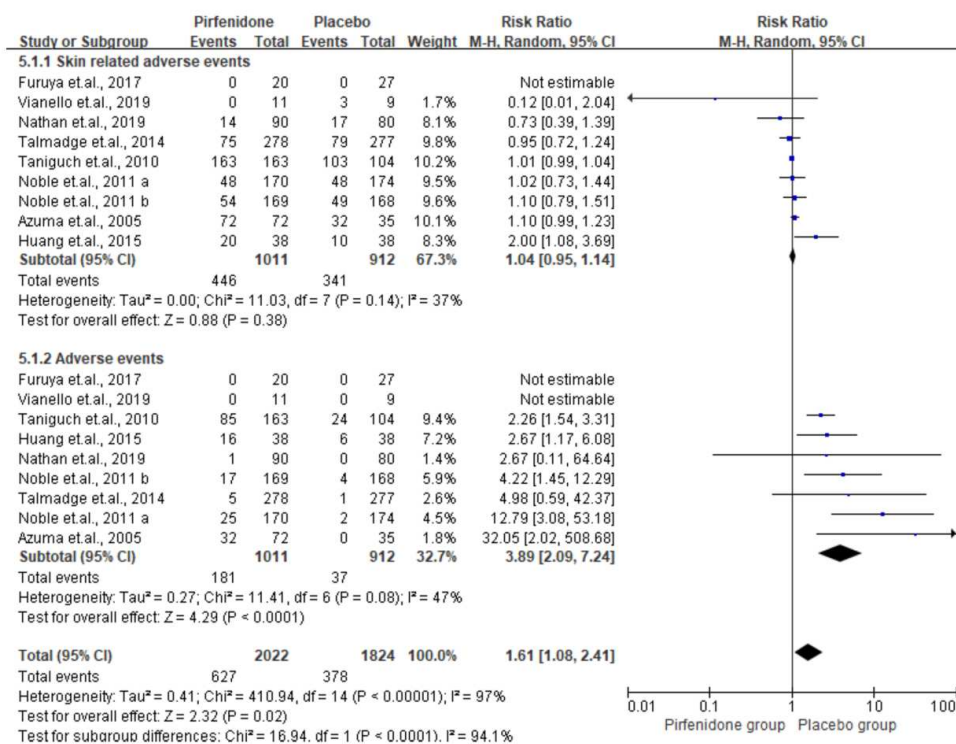

Supplementary Figure 3. Summarized adverse events.

**Supplementary Table 1. Jadad score for included studies**

| <b>Study included</b>  | <b>Randomization <sup>a</sup></b> | <b>Blinding <sup>b</sup></b> | <b>An account of all patients <sup>c</sup></b> | <b>Overall</b> |
|------------------------|-----------------------------------|------------------------------|------------------------------------------------|----------------|
| Azuma et al., 2005     | 2                                 | 2                            | 1                                              | 5              |
| Taniguchi et al., 2010 | 2                                 | 2                            | 1                                              | 5              |
| Noble et al., 2011     | 2                                 | 2                            | 1                                              | 5              |
| Noble et al., 2011     | 2                                 | 2                            | 1                                              | 5              |
| Talmadge et al., 2014  | 2                                 | 2                            | 1                                              | 5              |
| Huang et al., 2015     | 2                                 | 1                            | 1                                              | 4              |
| Furuya et al., 2017    | 2                                 | 1                            | 1                                              | 4              |
| Nathan et al., 2019    | 2                                 | 2                            | 1                                              | 5              |
| Vianello et al., 2019  | 2                                 | 1                            | 1                                              | 4              |

<sup>a</sup>, 1 point if randomization is mentioned, 1 additional point if the method of randomization is appropriate. Deduct 1 point if the method of randomization is inappropriate (minimum 0).

<sup>b</sup>, 1 point if blinding is mentioned, 1 additional point if the method of blinding is appropriate. Deduct 1 point if the method of blinding is inappropriate (minimum 0).

<sup>c</sup>, The fate of all patients in the trial is known. If there are no data, the reason is stated.

**Supplementary Table 2. Publication bias of summarized outcomes**

| <b>Outcomes</b>                                               | <b>Begg (<i>P</i>-value)</b> | <b>Egger (<i>P</i>-value)</b> |
|---------------------------------------------------------------|------------------------------|-------------------------------|
| Summarized all-cause mortality                                | 0.54                         | 0.24                          |
| Summarized IPF-related mortality                              | 0.78                         | 0.75                          |
| Summarized PFS                                                | 0.80                         | 0.72                          |
| Summarized worsening IPF                                      | 0.71                         | 0.50                          |
| Summarized acute exacerbation IPF                             | 0.64                         | 0.47                          |
| Summarized changes in >10% of FVC                             | 0.50                         | 0.40                          |
| Summarized changes in 6MWT                                    | 0.44                         | 0.31                          |
| Summarized changes in aminotransferase secondary to treatment | 0.91                         | 0.94                          |
| Summarized adverse events                                     | 0.40                         | 0.39                          |
| Summarized skin-related adverse events                        | 0.71                         | 0.60                          |
